# Supplementary material for: MOF-derived nanostructured cobalt phosphide assemblies for efficient hydrogen evolution reaction
Source: Royal Society of Chemistry journal article supplement (doi:10.1039/c5ra17427a), 2015-01-01
Supplement: c5ra17427a1.pdf [file c5ra17427a1.pdf]

## Electronic Supplementary Information (ESI) for

# MOF-derived nanostructured cobalt phosphide assemblies for efficient hydrogen evolution reaction

Lili Li,<sup>ab</sup> Xingyue Li,<sup>a</sup> Lunhong Ai,<sup>\*a</sup> and Jing Jiang,<sup>\*a</sup>

<sup>a</sup> Chemical Synthesis and Pollution Control Key Laboratory of Sichuan Province, College of Chemistry and Chemical Engineering, China West Normal University, 1 Shida Road, Nanchong 637002, P.R. China.

<sup>b</sup> i-Lab, Suzhou Institute of Nano-Tech and Nano-Bionics (SINANO), Chinese Academy of Sciences (CAS), 398 Ruoshui Road, Suzhou, 215123, P.R. China

E-mail: ah\_aihong@163.com (L. Ai); 0826zjjh@163.com (J. Jiang); Tel/Fax: +86-817-2568081

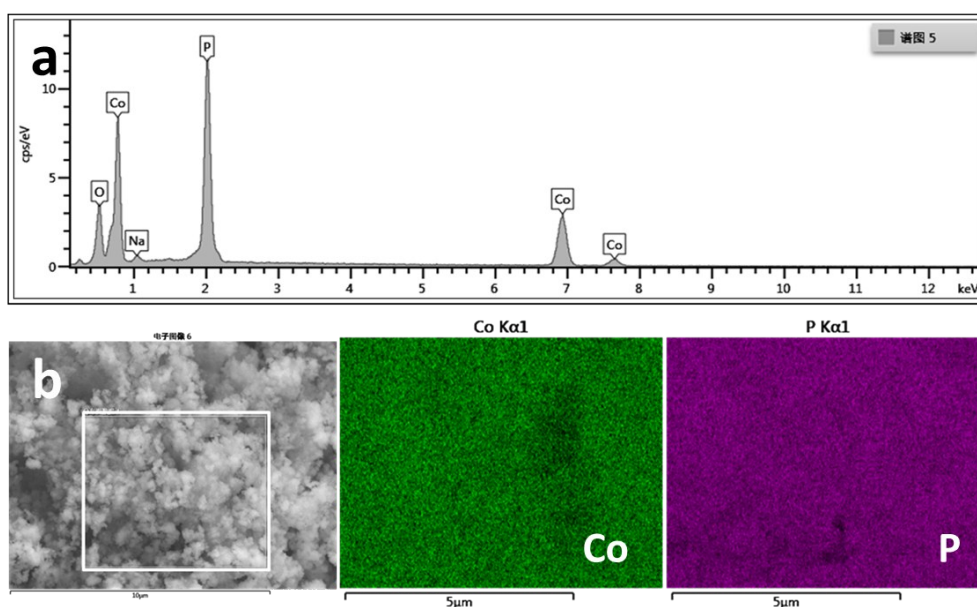

Fig. S1 EDS spectrum (a) and EDS-mapping images (b) of the CoP NRAs.

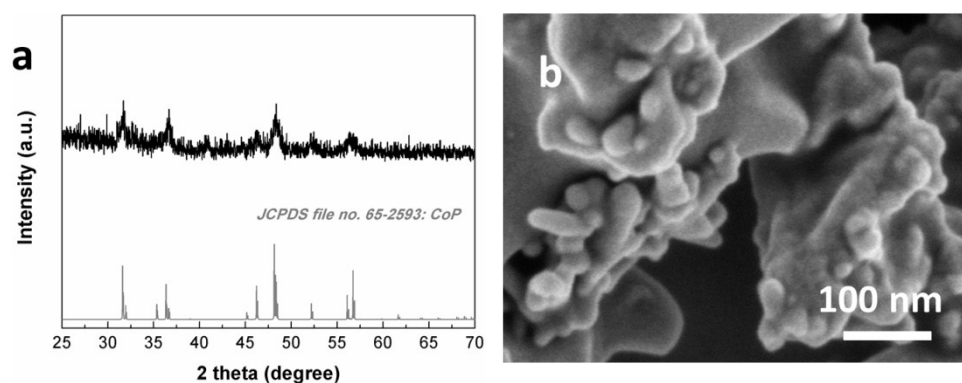

Fig. S2 XRD pattern (a) and SEM image (b) of the CoP NRAs after electrolysis.
